# Supplementary material
Source: MDPI journal article supplement (https://www.mdpi.com/2073-4441/12/8/2164)
Supplement: s1 [file s1]

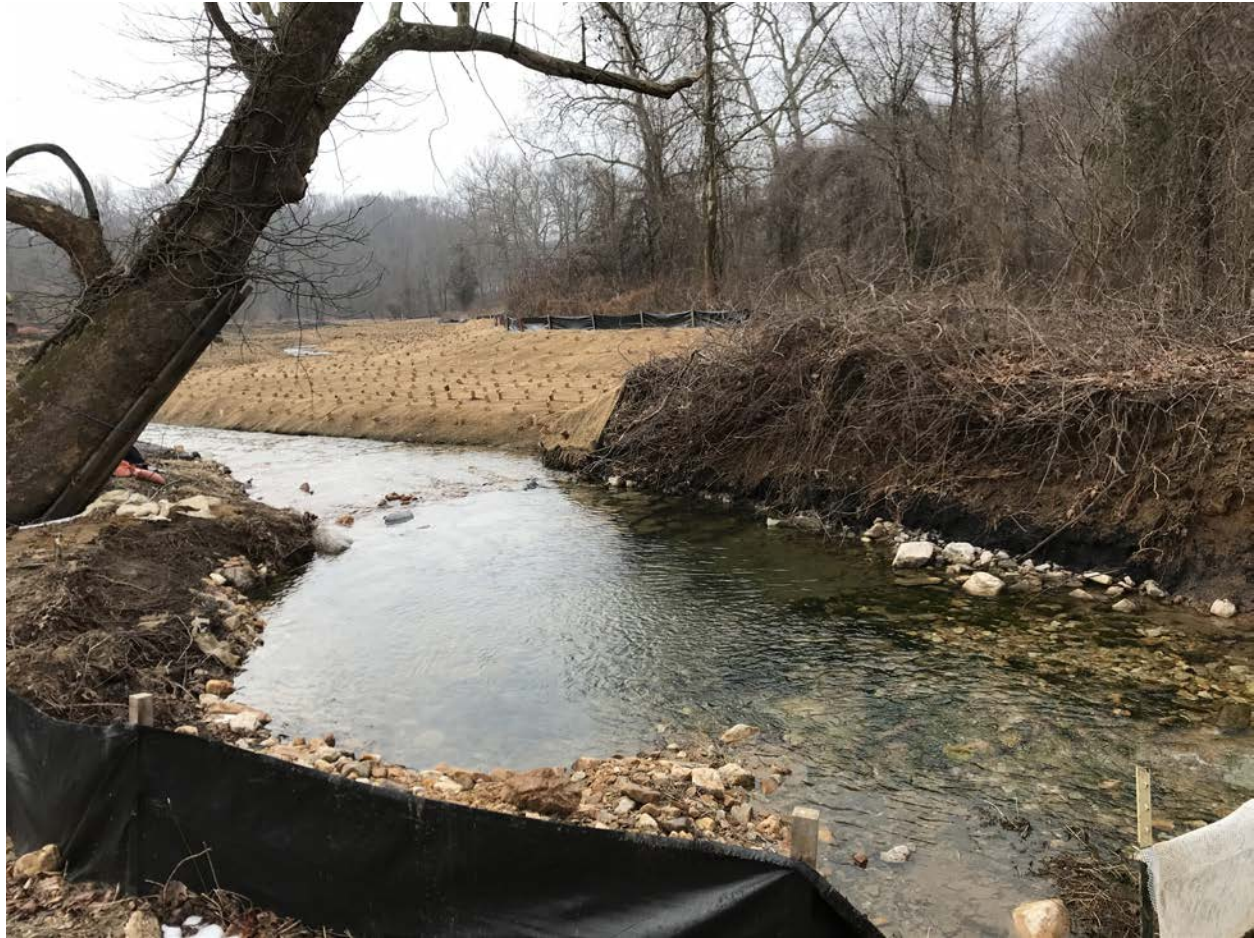

Figure S2: Partial construction/transition along Phase 2 showing restored (left) and unrestored (right) reaches. The junction represents a construction pause for the no-instream work period – March 1 to June 15. Note the height of the incised vertical bank and the buried organic horizon on the right, and the newly created wider floodplain on the left. White, Pleistocene era gravel can be seen below the dark organic horizon on the right.

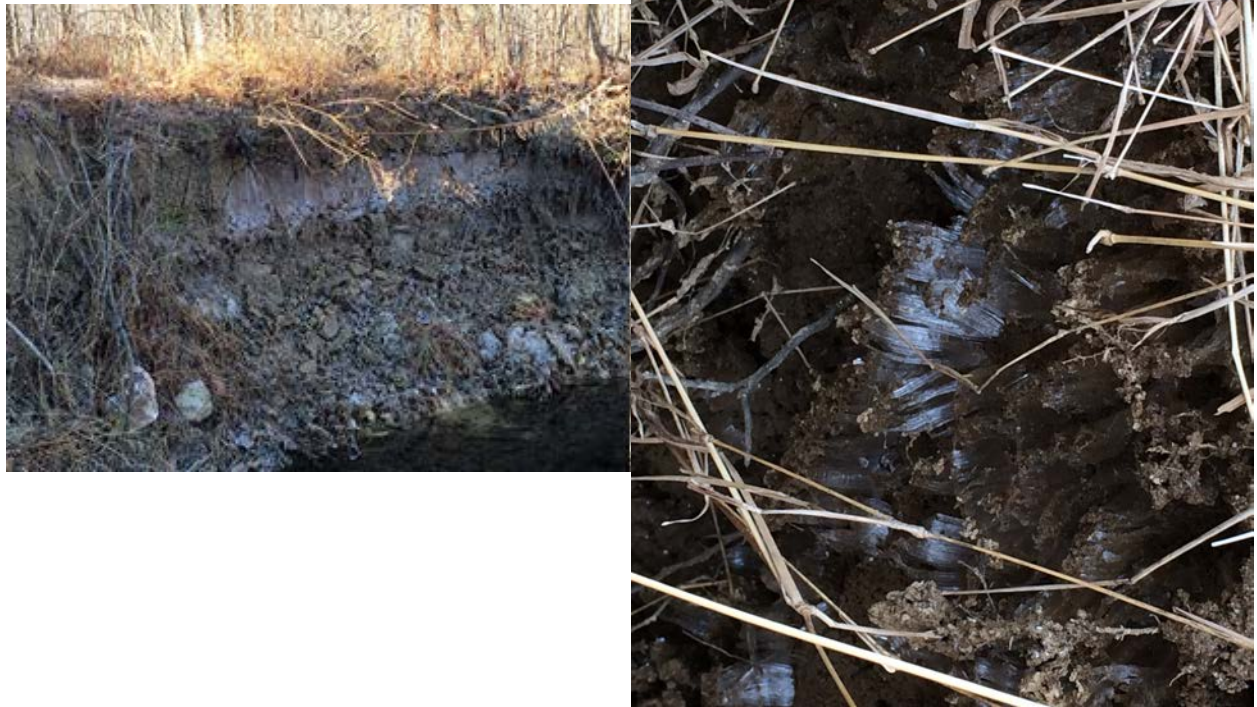

Figure S3: Streambank at Gramies Run (along Phase II restoration, same reach as in Figure S2) showing freeze-thaw drool and subaerial erosion following freeze-thaw conditions in winter.

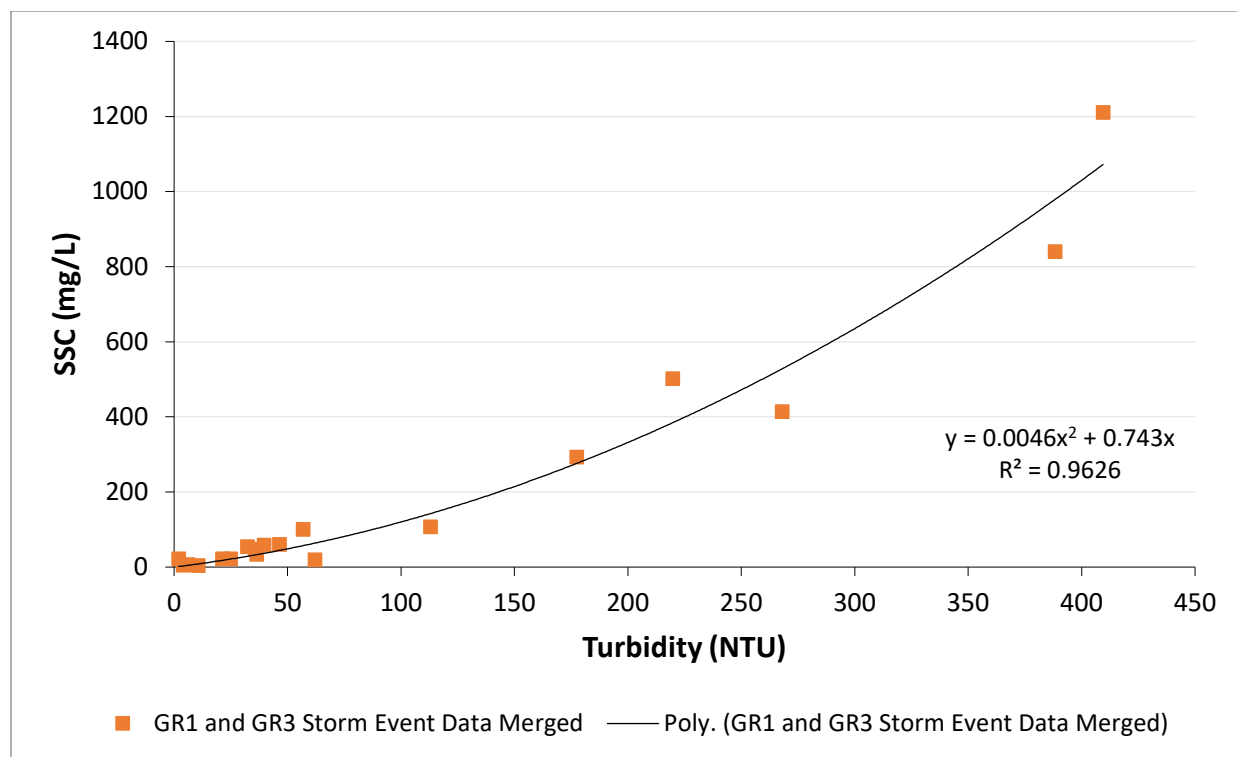

Figure S4: SSC-Turbidity relationship to convert turbidity values to SSC concentrations.
